# Supplementary material for: Evaluation of effective quantum yields of photosystem II for CO2 leakage monitoring in carbon capture and storage sites
Source: PeerJ. 2021 Jan 28;9:e10652. doi: 10.7717/peerj.10652 (PMC7847708; doi:10.7717/peerj.10652)
Supplement: Supplemental Information 1 — Give data show raw value of leaf chlorophyl content, photosynthesis and fluorescence measured by sensors. The treatments included control, 10% CO2 (10% soil CO2), 20% CO2 (20% soil CO2), 40% CO2 (40% soil CO2), water stress (WATER) and water stress with 40% CO2 treatment (WATER + CO2). The measuring date was October 10, 13, 15, and 18 (i.e., 0, 3, 5, and 8 days after experiment onset, respectively), 2018. [file peerj-09-10652-s001.xlsx]

## Sheet: chlorophyll content
Chlorophyll content													3th-4th leaf
SPAD	2018-10-08										2018-10-10											2018-10-13										2018-10-15									2018-10-18
	1	2	3	4	5	6	7	8	9	10	1	2	3	4	5	6	7	8	9	10	1	2	3	4	5	6	7	8	9	10	1	2	3	4	5	6	7	8	9	10	1	2	3	4	5	6	7	8	9
Control	47.4	49.7	46.5	55.3	52.7	55.3	43.1	46.9	44.8	49.3	47.4	48	41.2	49.8	48.3	51.4	46.5	39.6	45	44.5	49	43.7	52.2	51.3	43.9	45.7	48.7	40	48	41.3	46	43.3	49.7	46.3	50.5	44.9	52.7	44.1	51.9	49.1	43.1	44.3	46.8	49.5	41.7	49.4	47.6	49.7	43.1
	50.7	50.6	62.3	46	50.3	55.5	45.6	56.3	44.6	48	43.5	47.4	50.8	61.2	46.7	45.5	46	46.6	46.6	58.6	43	58.8	52.7	55.9	40.4	45.4	45.4	48.4	53.6	59.4	50.7	59.6	54.6	47.9	41.9	54.3	49.7	42.1	43.1	44.5	45	46.4	46.3	44.8	56.5	47	50.3	51	44.4
	45.2	50.3	54.6	49.3	42.5	57.4	47	54.1	42.7	52.1	48.9	42.9	49.4	48.3	40	43.7	46.7	48.6	50.1	51.5	38.9	38.7	48.9	48.2	45.7	56.1	46.1	42.3	48.8	39.5	52.1	43.2	53.2	46.8	57.8	48.2	40.6	54.7	46.9	43.3	47.7	36.6	47	48.5	46	44.2	42.8	47.5	43.7
water stress	48.3	54.9	50.8	51.7	48.4	48.8	50.4	48.8	51	51.8	47.7	51.5	47.7	45.9	54.7	45.9	50	58.6	51.2	42.2	48.3	40.2	52	50.1	41.4	50.5	50.5	44.9	44	47.7	49.6	43.1	54.9	45.7	45.3	46.4	41.7	43.5	44.5	51.5	39.6	48.1	44.9	44.2	39.7	44.2	32.9	50	42.9
	50.3	51	58.2	44.2	45	47	44	42.6	46.7	57.2	54.4	41.2	47.3	41	41.6	43.5	55.2	42.2	55	46.1	48.3	51.1	33.1	42.9	46.8	46.6	46.6	42.7	48.3	47.3	40.9	40.7	54.3	51.7	41.6	51	45.7	52.3	40.1	51.8	45	32.6	39.2	50.1	36.7	33.9	33.3	42.4	46
	44.4	60.9	47.4	45.1	45.6	50.3	48.4	46	52.1	56.7	43.2	51.5	49.1	44.7	45.6	48.7	54.7	44.7	39.6	44.5	43.6	47.2	49.1	40.7	41.2	43.1	43.1	45.7	50.3	42.4	57.1	45.8	44.7	47.9	41.4	42.7	41.7	43.3	41.9	42.8	37.8	38	37.6	37.8	39.9	29	23.3	27.9	34.9
10% CO2	55.2	41.4	48.3	46.3	57.6	41.9	51.4	54.3	50.5	44.4	59.2	50.2	44.4	42.8	45.9	47.1	37.2	49	48.3	35.7	42	46.2	55.9	46.1	39.4	45.1	45.1	42.7	47.4	33.2	35.7	51	59.5	45.2	44.1	47.5	45.7	41.8	55.6	47.6	26.4	41.5	44.9	48.8	33.3	20.7	29.3	28.4	39.3
	55.8	41.2	52.6	42.8	51.1	52.7	44.3	40.3	49.7	46.9	49.3	50	42.6	50.4	46	41.9	46.7	46.8	45.9	49.3	39.8	43.3	49.4	41.5	43.6	40.9	40.9	49.7	57.2	51.5	48.3	47.5	40.9	47.2	44.7	34.8	50.5	43.9	45.4	50.6	41	36.4	28.8	38.8	43.4	37.8	28.8	37.8	25.1
	48.5	44.8	40.6	48.3	43.4	53.5	42.8	45.6	40.8	38.8	52.8	41.1	56.8	44.3	45.1	48.1	46.2	40.9	42.9	50.1	53.8	48	40.2	36.8	48.7	53	53	36.1	41.2	46.5	52.1	41.9	51.1	48.4	52.1	42	31.6	44.1	45.1	37.1	37.8	42	32.1	22.6	28	43.5	31.1	32.2	23.3
20% CO2	44.9	51	58.4	56	54.2	49.5	56.9	52.6	49.3	45.5	48.5	45.5	41.2	44.7	50.8	52.5	51.5	47.9	47.9	50.4	46	39.5	46.7	40.3	53.4	52.8	52.8	42.4	46.5	51.7	46.7	39.9	50.8	50.4	57.8	39.3	47.8	50.7	49.6	44.1	24.6	28.4	35.8	37.5	29.8	19.4	24.6	26.1	42.6
	53.6	50.1	52	48.9	43.6	47.8	52.8	51	56.1	53.7	51.3	54.7	46.3	52.1	45.9	47.8	35.3	55.2	54.8	47.7	51.3	48.8	50	44	43.2	44.2	44.2	34	47.2	48.4	51.9	43.8	43.1	50.7	50.8	36.6	49.3	42.7	45.3	48.1	43.2	35.4	44.5	17.1	23.6	32.1	30.9	34.3	18.9
	51.7	48.9	48.8	46.5	42.3	49.3	40	51.3	53.5	48.5	47.6	46.7	51.3	52.3	51.5	43.1	57	47.4	42.4	47.3	49.2	53.2	50.5	46.2	46.7	45.4	45.4	45.9	42.9	47.8	52.7	51.2	52.1	51.9	54.2	47.4	49.5	43.5	53.7	42	35.5	35.1	41.6	23.7	43.3	51.7	41.6	48.2	21.8
40% CO2	43.3	49.1	55.5	46.4	47	47.8	42.3	44.6	55.3	50.5	50.5	44.7	46	47.4	51.4	49.2	53.1	57.4	45.6	45.1	39.4	53	45.1	40.2	41.4	53.5	53.5	44.2	43.7	43.5	41.3	44.8	40.8	43.2	51.6	52	42	40.5	45.2	47.5	29.8	36.1	33.3	33.1	36.8	22	41.2	50.8	33.6
	48.2	44.1	56.1	45.3	50.8	48.4	46.5	44.6	45.1	48.9	46.2	46.5	53	46	46.3	54.8	47.9	49.5	48.5	54.8	41.5	47	41.9	44.7	48.7	46.1	46.1	45.1	47.7	41.8	43.1	48	51.7	52.6	45	52.3	50.1	42.8	54.1	45.8	23	33.8	38.1	38.7	42.8	53.8	27.8	35	46
	49.5	46.8	53.5	44.3	43.7	46.3	45.1	41.1	42.6	50.9	45.6	44.9	42.6	41.8	45.7	44	48.3	47.3	46.1	53	40.6	50.2	50.4	46.4	46.2	42.3	42.3	43.4	50.3	40.5	47.9	32.7	52.4	42.1	46.9	44.7	47.2	47.1	50.9	43.1	25.5	35.4	45.9	31.1	31.8	32.2	26	44	44.3
water stress* 40% CO2	49.2	51.9	49.8	46.2	39.3	47.7	46.9	46.8	47.2	48.8	45.6	55.3	40.7	46.3	54.6	37.3	51.5	47.1	48.9	54.1	46.8	53.1	44.2	49.6	53	47.6	47.6	38.9	46.8	53.1	43.5	54.5	49.4	31.9	47.3	56.3	48	53	42.6	43.4	44.6	33.7	41.5	31.6	24.4	36.2	24.2	25	44
											47.3	53.5	35.6	42.8	41.4	47	42.4	40.3	53.5	46.7	41.4	43.3	38.5	52.6	46.7	49.8	49.8	44.6	44.5	50.1	45	43	48.1	41.8	41.7	48.7	58.6	45.4	38.6	42.3	46.4	24.2	41.5	29.5	40.2	45.3	31.3	38.6	42.6
											44.8	46.6	49.5	49.4	45.5	56.6	49.3	40.3	50	47.8	48.2	43.8	50.5	42.5	37.3	38.9	38.9	38.2	43.5	48.2	39.1	45.3	34.4	42.8	37	46.5	46.2	49.3	52	38.3	35.7	39.8	26.7	26.3	30.5	24.5	26.5	21.8	29
[truncated: 1 more columns]

## Sheet: photosynthesis
Photosynthesis
	2019-10-10			2019-10-13			2019-10-15			2019-10-18
	Pn	Gs	Tr	Pn	Gs	Tr	Pn	Gs	Tr	Pn	Gs	Tr
control	15.9207	0.180296	2.90132	19.2333	0.207089	3.43107	15.2744	0.308959	3.28448	3.86534	17.6804	0.364466
	10.974	0.0866737	1.72681	22.7466	0.273605	4.00238	15.9322	0.398302	3.98975	3.02617	13.5315	0.286561
	12.8603	0.131464	2.45757	23.4509	0.340199	4.41097	13.8582	0.252394	3.65948	3.44393	13.6101	0.310283
	13.2147	0.119523	2.40051	16.5728	0.2084	3.36682				3.33922	10.4005	0.282306
	19.2622	0.316702	3.98136
10% CO2	11.9414	0.128649	2.3212	16.0518	0.12496	1.87393	7.59095	0.0915838	1.69778	3.71467	13.6982	0.305066
	10.7755	0.106699	2.08359	13.9455	0.174907	2.90015	7.79605	0.101129	1.61695	1.52864	7.15355	0.0832601
	11.5722	0.106342	2.00291	13.5748	0.0982466	1.85036	10.0317	0.208428	2.61907	3.74137	12.7244	0.314018
	18.6725	0.168402
	18.6349	0.185415
	17.6859	0.184394
20% CO2	17.3718	0.219811	3.86833	12.5599	0.159177	2.45089	14.7635	0.202416	2.71015	1.72531	7.68293	0.0960154
	17.966	0.208584	3.67129	14.0671	0.192743	3.26027	10.9829	0.132679	1.97041	2.61129	11.1547	0.163573
	8.97465	0.0764804	1.41811	14.1067	0.0984985	2.07341	10.3187	0.158746	2.56323	2.45086	12.8086	0.172526
	13.922	0.181488	2.85153	20.691	0.232504	3.82394
	23.1114	0.302419		20.8208	0.209367	3.77594
40% CO2	14.079	0.182674	3.25758	9.28166	0.114215	1.90936	11.2505	0.116497	2.03539	1.08499	6.28556	0.0552745
	14.6099	0.134947	2.41748	12.5626	0.103814	1.81656	11.2477	0.108343	2.05929	0.881212	6.54879	0.0489182
	15.8278	0.222083	3.59524	9.45562	0.0699194	1.2816	8.39167	0.063538	1.33817	1.29412	9.35927	0.0768839
				13.9379	0.0678175	1.5126
water	10.5278	0.153265		14.7649	0.095003	2.33924	12.7331	0.145892	2.38648	1.14736	8.15106	0.0781461
	16.5803	0.184357	2.99664	13.1648	0.0994889	2.19909	13.1636	0.185017	2.73599	0.535756	3.40478	0.023755
	16.056	0.165422	2.7876	14.6103	0.145616	2.50687	10.2722	0.0935457	1.56808	0.511232	3.0229	0.0226788
	19.4452	0.277083	4.03163	12.8359	0.139633	2.49022
				16.7706	0.123648	2.57849
water+40CO2	19.4432	0.2327	3.45629	6.10844	0.0124904	0.313891	6.80684	0.0782137	1.38226	0.645177	5.44175	0.0297222
	17.8756	0.1761	2.93657	16.5798	0.10491	2.3373	11.1089	0.134964	2.42866	0.920013	6.08286	0.0439546
	12.085	0.0749773	1.65776	14.501	0.0867236	1.73265	10.9573	0.0996578	1.9486	0.249667	0.728541	0.014057
				12.0828	0.119345	2.06174

## Sheet: fluorescence
treatment	date	repeat	YII	ETR
control	2019-10-10	1	0.44	118.88
control	2019-10-10	2	0.42	113.89
control	2019-10-10	3	0.44	119.72
control	2019-10-10	4	0.38	102.46
control	2019-10-10	5	0.41	109.5
control	2019-10-10	6	0.41	109.54
control	2019-10-10	7	0.39	102.97
control	2019-10-10	8	0.4	106.7
control	2019-10-10	9	0.45	122.67
control	2019-10-10	10	0.38	103.12
control	2019-10-10	11	0.37	99.42
control	2019-10-10	12	0.36	94.39
control	2019-10-10	13	0.28	72.42
control	2019-10-10	14	0.37	102.33
control	2019-10-10	15	0.34	91.71
control	2019-10-10	16	0.34	89.47
control	2019-10-10	17	0.35	94.44
10 CO2	2019-10-10	1	0.38	103.33
10 CO2	2019-10-10	2	0.43	114.58
10 CO2	2019-10-10	3	0.46	123.74
10 CO2	2019-10-10	4	0.37	102.31
10 CO2	2019-10-10	5	0.37	101.26
10 CO2	2019-10-10	6	0.33	89.51
10 CO2	2019-10-10	7	0.41	111.72
10 CO2	2019-10-10	8	0.47	127.59
10 CO2	2019-10-10	9	0.42	113.27
10 CO2	2019-10-10	10	0.32	86.92
10 CO2	2019-10-10	11	0.39	105.69
10 CO2	2019-10-10	12	0.43	114.98
10 CO2	2019-10-10	13	0.22	57.39
10 CO2	2019-10-10	14	0.29	77.94
10 CO2	2019-10-10	15	0.35	95.63
10 CO2	2019-10-10	16	0.4	106.88
10 CO2	2019-10-10	17	0.3	79.61
20 CO2	2019-10-10	1	0.34	91.46
20 CO2	2019-10-10	2	0.39	105.96
20 CO2	2019-10-10	3	0.37	98.85
20 CO2	2019-10-10	4	0.38	103.2
20 CO2	2019-10-10	5	0.36	97.79
20 CO2	2019-10-10	6	0.41	110.43
20 CO2	2019-10-10	7	0.31	84.82
20 CO2	2019-10-10	8	0.35	96.88
20 CO2	2019-10-10	9	0.34	90.4
20 CO2	2019-10-10	10	0.3	78.68
20 CO2	2019-10-10	11	0.36	94.13
20 CO2	2019-10-10	12	0.35	88.73
20 CO2	2019-10-10	13	0.33	86.94
20 CO2	2019-10-10	14	0.34	91.82
20 CO2	2019-10-10	15	0.33	88.12
20 CO2	2019-10-10	16	0.44	120.4
20 CO2	2019-10-10	17	0.37	96.2
40 CO2	2019-10-10	1	0.36	98.05
40 CO2	2019-10-10	2	0.4	106.84
40 CO2	2019-10-10	3	0.38	102.72
40 CO2	2019-10-10	4	0.34	93.61
40 CO2	2019-10-10	5	0.42	113.84
40 CO2	2019-10-10	6	0.38	105.15
40 CO2	2019-10-10	7	0.27	71.09
40 CO2	2019-10-10	8	0.37	98.41
40 CO2	2019-10-10	9	0.36	97.43
40 CO2	2019-10-10	10	0.41	111.1
40 CO2	2019-10-10	11	0.35	94.82
40 CO2	2019-10-10	12	0.35	94.74
40 CO2	2019-10-10	13	0.34	91.96
40 CO2	2019-10-10	14	0.35	95.99
40 CO2	2019-10-10	15	0.35	95.32
40 CO2	2019-10-10	16	0.32	85.42
40 CO2	2019-10-10	17	0.31	82.09
WATER	2019-10-10	1	0.38	101.6
WATER	2019-10-10	2	0.3	77.27
WATER	2019-10-10	3	0.35	90.99
WATER	2019-10-10	4	0.37	100.42
WATER	2019-10-10	5	0.43	116.35
WATER	2019-10-10	6	0.32	84.8
WATER	2019-10-10	7	0.4	103.26
WATER	2019-10-10	8	0.34	91.85
WATER	2019-10-10	9	0.43	116.89
WATER	2019-10-10	10	0.28	76.51
WATER	2019-10-10	11	0.42	114.47
WATER	2019-10-10	12	0.39	107.64
WATER	2019-10-10	13	0.31	84.64
WATER	2019-10-10	14	0.4	107.59
WATER	2019-10-10	15	0.32	86.23
WATER	2019-10-10	16	0.39	103.92
WATER	2019-10-10	17	0.41	107.12
WATER+CO2	2019-10-10	1	0.24	62.56
WATER+CO2	2019-10-10	2	0.37	101.08
WATER+CO2	2019-10-10	3	0.31	83.03
WATER+CO2	2019-10-10	4	0.26	69.45
WATER+CO2	2019-10-10	5	0.37	98.7
WATER+CO2	2019-10-10	6	0.36	98.51
WATER+CO2	2019-10-10	7	0.43	116.74
WATER+CO2	2019-10-10	8	0.36	96.94
WATER+CO2	2019-10-10	9	0.37	97.28
WATER+CO2	2019-10-10	10	0.39	105.41
WATER+CO2	2019-10-10	11	0.35	95.48
WATER+CO2	2019-10-10	12	0.34	92.24
WATER+CO2	2019-10-10	13	0.38	105.18
WATER+CO2	2019-10-10	14	0.37	100.06
WATER+CO2	2019-10-10	15	0.34	92.29
WATER+CO2	2019-10-10	16	0.28	75.38
WATER+CO2	2019-10-10	17	0.41	111.69
control	2019-10-13	1	0.21	55.65
control	2019-10-13	2	0.28	74.91
control	2019-10-13	3	0.18	48.87
control	2019-10-13	4	0.45	121.68
control	2019-10-13	5	0.42	116.14
control	2019-10-13	6	0.4	109.47
control	2019-10-13	7	0.33	89.36
control	2019-10-13	8	0.29	78.1
control	2019-10-13	9	0.22	57.68
control	2019-10-13	10	0.33	89.52
control	2019-10-13	11	0.38	102.94
control	2019-10-13	12	0.34	92.96
control	2019-10-13	13	0.3	79.19
control	2019-10-13	14	0.25	66.56
control	2019-10-13	15	0.32	84.59
control	2019-10-13	16	0.3	80.56
control	2019-10-13	17	0.17	46.84
control	2019-10-13	18	0.26	70.99
10 CO2	2019-10-13	1	0.14	39.7
10 CO2	2019-10-13	2	0.27	71.55
10 CO2	2019-10-13	3	0.3	79.96
10 CO2	2019-10-13	4	0.4	100.61
10 CO2	2019-10-13	5	0.31	82.42
10 CO2	2019-10-13	6	0.25	66.69
10 CO2	2019-10-13	7	0.22	58.19
10 CO2	2019-10-13	8	0.31	81
10 CO2	2019-10-13	9	0.17	45.45
10 CO2	2019-10-13	10	0.39	106.26
10 CO2	2019-10-13	11	0.33	89.62
10 CO2	2019-10-13	12	0.34	91.13
10 CO2	2019-10-13	13	0.18	48.72
10 CO2	2019-10-13	14	0.22	57.87
10 CO2	2019-10-13	15	0.23	61.94
10 CO2	2019-10-13	16	0.24	63.3
10 CO2	2019-10-13	17	0.26	71.86
10 CO2	2019-10-14	18	0.25	68.3
20 CO2	2019-10-13	1	0.15	39.59
20 CO2	2019-10-13	2	0.23	61.49
20 CO2	2019-10-13	3	0.13	36.38
20 CO2	2019-10-13	4	0.23	57.27
20 CO2	2019-10-13	5	0.36	98.32
20 CO2	2019-10-13	6	0.39	104.26
20 CO2	2019-10-13	7	0.19	49.92
20 CO2	2019-10-13	8	0.17	36.19
20 CO2	2019-10-13	9	0.14	40.07
20 CO2	2019-10-13	10	0.2	54.5
20 CO2	2019-10-13	11	0.11	29.78
20 CO2	2019-10-13	12	0.17	46.23
20 CO2	2019-10-13	13	0.11	28.47
20 CO2	2019-10-13	14	0.26	69.86
20 CO2	2019-10-13	15	0.2	54.52
20 CO2	2019-10-13	16	0.37	96.33
20 CO2	2019-10-13	17	0.41	110.55
20 CO2	2019-10-14	18	0.37	98.54
40 CO2	2019-10-13	1	0.16	42.86
40 CO2	2019-10-13	2	0.22	55.87
40 CO2	2019-10-13	3	0.15	41.4
40 CO2	2019-10-13	4	0.18	46.46
40 CO2	2019-10-13	5	0.18	49.47
40 CO2	2019-10-13	6	0.17	47.25
40 CO2	2019-10-13	7	0.16	40.24
40 CO2	2019-10-13	8	0.13	34.11
40 CO2	2019-10-13	9	0.21	55.09
40 CO2	2019-10-13	10	0.18	47.72
40 CO2	2019-10-13	11	0.11	30.4
40 CO2	2019-10-13	12	0.17	46.39
40 CO2	2019-10-13	13	0.1	27.87
40 CO2	2019-10-13	14	0.09	25.15
40 CO2	2019-10-13	15	0.17	45.14
40 CO2	2019-10-13	16	0.3	83.22
40 CO2	2019-10-13	17	0.32	84.76
40 CO2	2019-10-14	18	0.32	87.2
WATER	2019-10-13	1	0.29	76.99
WATER	2019-10-13	2	0.26	70.77
WATER	2019-10-13	3	0.26	68.51
WATER	2019-10-13	4	0.19	47.19
WATER	2019-10-13	5	0.16	44.14
WATER	2019-10-13	6	0.26	69.45
WATER	2019-10-13	7	0.25	67.46
WATER	2019-10-13	8	0.25	65.23
WATER	2019-10-13	9	0.23	61.7
WATER	2019-10-13	10	0.41	107.35
WATER	2019-10-13	11	0.38	101.72
WATER	2019-10-13	12	0.23	59.78
WATER	2019-10-13	13	0.25	67.16
WATER	2019-10-13	14	0.23	60.38
WATER	2019-10-13	15	0.21	57.01
WATER	2019-10-13	16	0.17	44.91
WATER	2019-10-13	17	0.19	51.88
WATER	2019-10-14	18	0.21	55.51
WATER+CO2	2019-10-13	1	0.17	43.97
WATER+CO2	2019-10-13	2	0.11	30.55
WATER+CO2	2019-10-13	3	0.11	29.75
WATER+CO2	2019-10-13	4	0.21	55.08
WATER+CO2	2019-10-13	5	0.16	44.63
WATER+CO2	2019-10-13	6	0.16	41.59
WATER+CO2	2019-10-13	7	0.11	27.67
WATER+CO2	2019-10-13	8	0.1	26.91
WATER+CO2	2019-10-13	9	0.17	43.11
WATER+CO2	2019-10-13	10	0.15	41.02
WATER+CO2	2019-10-13	11	0.09	26.83
WATER+CO2	2019-10-13	12	0.17	45.79
WATER+CO2	2019-10-13	13	0.1	25.23
WATER+CO2	2019-10-13	14	0.08	21.77
WATER+CO2	2019-10-13	15	0.1	26.66
WATER+CO2	2019-10-13	16	0.22	57.62
WATER+CO2	2019-10-13	17	0.26	69.53
WATER+CO2	2019-10-13	18	0.32	84.19
control	2019-10-15	1	0.27	71.71
control	2019-10-15	2	0.35	96.1
control	2019-10-15	3	0.36	98.07
control	2019-10-15	4	0.39	106.04
control	2019-10-15	5	0.39	106.76
control	2019-10-15	6	0.43	116.96
control	2019-10-15	7	0.38	111.63
control	2019-10-15	8	0.37	100.66
control	2019-10-15	9	0.4	109.84
control	2019-10-15	10	0.39	105.34
control	2019-10-15	11	0.39	107.95
control	2019-10-15	12	0.36	96.62
control	2019-10-15	13	0.33	90.17
control	2019-10-15	14	0.39	101.31
control	2019-10-15	15	0.34	94.25
control	2019-10-15	16	0.31	83.11
control	2019-10-15	17	0.35	93.37
control	2019-10-15	18	0.36	97.96
10 CO2	2019-10-15	1	0.2	53.97
10 CO2	2019-10-15	2	0.25	65.59
10 CO2	2019-10-15	3	0.31	84.53
10 CO2	2019-10-15	4	0.3	79.98
10 CO2	2019-10-15	5	0.27	72.33
10 CO2	2019-10-15	6	0.33	85.6
10 CO2	2019-10-15	7	0.29	82.45
10 CO2	2019-10-15	8	0.16	46.68
10 CO2	2019-10-15	9	0.29	59.01
10 CO2	2019-10-15	10	0.23	67.5
10 CO2	2019-10-15	11	0.28	64.28
10 CO2	2019-10-15	12	0.36	93.91
10 CO2	2019-10-15	13	0.35	94.03
10 CO2	2019-10-15	14	0.28	76.97
10 CO2	2019-10-15	15	0.22	59.73
10 CO2	2019-10-15	16	0.14	39.12
10 CO2	2019-10-15	17	0.25	51.68
10 CO2	2019-10-15	18	0.23	63.98
20 CO2	2019-10-15	1	0.27	72.16
20 CO2	2019-10-15	2	0.14	37.97
20 CO2	2019-10-15	3	0.27	76.42
20 CO2	2019-10-15	4	0.22	52.87
20 CO2	2019-10-15	5	0.23	50.6
20 CO2	2019-10-15	6	0.35	87.49
20 CO2	2019-10-15	7	0.31	87.04
20 CO2	2019-10-15	8	0.2	54.6
20 CO2	2019-10-15	9	0.18	48.05
20 CO2	2019-10-15	10	0.23	55.87
20 CO2	2019-10-15	11	0.21	59.27
20 CO2	2019-10-15	12	0.23	60.31
20 CO2	2019-10-15	13	0.25	66.5
20 CO2	2019-10-15	14	0.34	86.7
20 CO2	2019-10-15	15	0.35	94.52
20 CO2	2019-10-15	16	0.29	80.53
20 CO2	2019-10-15	17	0.3	78.51
20 CO2	2019-10-15	18	0.29	79.24
40 CO2	2019-10-15	1	0.3	79.22
40 CO2	2019-10-15	2	0.19	50.82
40 CO2	2019-10-15	3	0.26	74.52
40 CO2	2019-10-15	4	0.29	76.91
40 CO2	2019-10-15	5	0.19	53.98
40 CO2	2019-10-15	6	0.23	48.66
40 CO2	2019-10-15	7	0.16	48.4
40 CO2	2019-10-15	8	0.22	45.33
40 CO2	2019-10-15	9	0.3	76.89
40 CO2	2019-10-15	10	0.32	84.86
40 CO2	2019-10-15	11	0.25	70.23
40 CO2	2019-10-15	12	0.18	51.44
40 CO2	2019-10-15	13	0.29	64.31
40 CO2	2019-10-15	14	0.23	65.34
40 CO2	2019-10-15	15	0.27	65.01
40 CO2	2019-10-15	16	0.26	71.76
40 CO2	2019-10-15	17	0.35	83.11
40 CO2	2019-10-15	18	0.35	87.81
WATER	2019-10-15	1	0.33	90.17
WATER	2019-10-15	2	0.21	56.34
WATER	2019-10-15	3	0.24	66.02
WATER	2019-10-15	4	0.32	77.49
WATER	2019-10-15	5	0.29	81.55
WATER	2019-10-15	6	0.32	83.13
WATER	2019-10-15	7	0.32	87.67
WATER	2019-10-15	8	0.31	84.35
WATER	2019-10-15	9	0.31	82.28
WATER	2019-10-15	10	0.33	86.69
WATER	2019-10-15	11	0.33	89.76
WATER	2019-10-15	12	0.33	90.1
WATER	2019-10-15	13	0.32	86.42
WATER	2019-10-15	14	0.28	76.73
WATER	2019-10-15	15	0.23	63.73
WATER	2019-10-15	16	0.21	56.87
WATER	2019-10-15	17	0.26	66.78
WATER	2019-10-15	18	0.37	94.69
WATER+CO2	2019-10-15	1	0.32	85.52
WATER+CO2	2019-10-15	2	0.35	94.16
WATER+CO2	2019-10-15	3	0.31	85.38
WATER+CO2	2019-10-15	4	0.26	71.49
WATER+CO2	2019-10-15	5	0.18	50.93
WATER+CO2	2019-10-15	6	0.25	59.12
WATER+CO2	2019-10-15	7	0.26	71.53
WATER+CO2	2019-10-15	8	0.26	70.24
WATER+CO2	2019-10-15	9	0.24	64.11
WATER+CO2	2019-10-15	10	0.3	73.15
WATER+CO2	2019-10-15	11	0.25	67.48
WATER+CO2	2019-10-15	12	0.31	74.62
WATER+CO2	2019-10-15	13	0.25	70.25
WATER+CO2	2019-10-15	14	0.27	70
WATER+CO2	2019-10-15	15	0.25	68.72
WATER+CO2	2019-10-15	16	0.18	47.36
WATER+CO2	2019-10-15	17	0.18	48.93
WATER+CO2	2019-10-15	18	0.2	56.25
control	2019-10-18	1	0.07	19.21
control	2019-10-18	2	0.39	104.59
control	2019-10-18	3	0.27	73.74
control	2019-10-18	4	0.3	81.37
control	2019-10-18	5	0.35	97.99
control	2019-10-18	6	0.35	95.07
control	2019-10-18	7	0.29	77.79
control	2019-10-18	8	0.21	58.2
control	2019-10-18	9	0.25	68.36
control	2019-10-18	10	0.26	70.75
control	2019-10-18	11	0.38	104.77
control	2019-10-18	12	0.26	72.25
control	2019-10-18	13	0.3	80.27
control	2019-10-18	14	0.29	76.32
control	2019-10-18	15	0.35	96.47
control	2019-10-18	16	0.12	32.52
control	2019-10-18	17	0.3	82.73
control	2019-10-18	18	0.27	71.98
10 CO2	2019-10-18	1	0.24	62.63
10 CO2	2019-10-18	2	0.28	74.86
10 CO2	2019-10-18	3	0.37	99.39
10 CO2	2019-10-18	4	0.24	65.39
10 CO2	2019-10-18	5	0.3	81.61
10 CO2	2019-10-18	6	0.28	77.05
10 CO2	2019-10-18	7	0.38	102.24
10 CO2	2019-10-18	8	0.32	87.6
10 CO2	2019-10-18	9	0.33	88.13
10 CO2	2019-10-18	10	0.18	48.45
10 CO2	2019-10-18	11	0.31	83.48
10 CO2	2019-10-18	12	0.13	34.72
10 CO2	2019-10-18	13	0.16	43
10 CO2	2019-10-18	14	0.15	40.35
10 CO2	2019-10-18	15	0.29	76.03
10 CO2	2019-10-18	16	0.21	54.71
10 CO2	2019-10-18	17	0.18	46.57
10 CO2	2019-10-18	18	0.09	25.23
20 CO2	2019-10-18	1	0.05	12.76
20 CO2	2019-10-18	2	0.31	84.94
20 CO2	2019-10-18	3	0.35	96.35
20 CO2	2019-10-18	4	0.11	29.96
20 CO2	2019-10-18	5	0.09	24.91
20 CO2	2019-10-18	6	0.16	45.17
20 CO2	2019-10-18	7	0.12	34.18
20 CO2	2019-10-18	8	0.11	29.23
20 CO2	2019-10-18	9	0.27	73.56
20 CO2	2019-10-18	10	0.14	36.15
20 CO2	2019-10-18	11	0.13	35.2
20 CO2	2019-10-18	12	0.2	52.44
20 CO2	2019-10-18	13	0.31	81.42
20 CO2	2019-10-18	14	0.18	46.99
20 CO2	2019-10-18	15	0.28	74.23
20 CO2	2019-10-18	16	0.09	24.09
20 CO2	2019-10-18	17	0.04	11.19
20 CO2	2019-10-18	18	0.05	13.28
40 CO2	2019-10-18	1	0.11	30.5
40 CO2	2019-10-18	2	0.08	22.39
40 CO2	2019-10-18	3	0.36	99.49
40 CO2	2019-10-18	4	0.15	39.4
40 CO2	2019-10-18	5	0.12	31.31
40 CO2	2019-10-18	6	0.11	29.91
40 CO2	2019-10-18	7	0.23	63.08
40 CO2	2019-10-18	8	0.14	38.04
40 CO2	2019-10-18	9	0.14	37.94
40 CO2	2019-10-18	10	0.14	36.9
40 CO2	2019-10-18	11	0.09	24.11
40 CO2	2019-10-18	12	0.12	30.8
40 CO2	2019-10-18	13	0.16	41.76
40 CO2	2019-10-18	14	0.23	61.62
40 CO2	2019-10-18	15	0.23	60.26
40 CO2	2019-10-18	16	0.04	11.61
40 CO2	2019-10-18	17	0.1	25.95
40 CO2	2019-10-18	18	0.14	36.44
WATER	2019-10-18	1	0.08	22.11
WATER	2019-10-18	2	0.18	48.56
WATER	2019-10-18	3	0.13	35.49
WATER	2019-10-18	4	0.18	47.65
WATER	2019-10-18	5	0.23	62.23
WATER	2019-10-18	6	0.27	72.05
WATER	2019-10-18	7	0.19	51.12
WATER	2019-10-18	8	0.41	110.15
WATER	2019-10-18	9	0.15	40.79
WATER	2019-10-18	10	0.14	39.09
WATER	2019-10-18	11	0.14	38.33
WATER	2019-10-18	12	0.08	23.76
WATER	2019-10-18	13	0.07	18.76
WATER	2019-10-18	14	0.32	88.54
WATER	2019-10-18	15	0.27	73.56
WATER	2019-10-18	16	0.15	40.47
WATER	2019-10-18	17	0.15	41.93
WATER	2019-10-18	18	0.25	68.04
WATER+CO2	2019-10-18	1	0.08	23.43
WATER+CO2	2019-10-18	2	0.15	41.04
WATER+CO2	2019-10-18	3	0.18	48.67
WATER+CO2	2019-10-18	4	0.07	18.02
WATER+CO2	2019-10-18	5	0.07	18.56
WATER+CO2	2019-10-18	6	0.17	46.06
WATER+CO2	2019-10-18	7	0.08	21.48
WATER+CO2	2019-10-18	8	0.09	26.72
WATER+CO2	2019-10-18	9	0.09	22.34
WATER+CO2	2019-10-18	10	0.22	57.27
WATER+CO2	2019-10-18	11	0.1	26.72
WATER+CO2	2019-10-18	12	0.09	23.37
WATER+CO2	2019-10-18	13	0.03	7.98
WATER+CO2	2019-10-18	14	0.11	30.06
WATER+CO2	2019-10-18	15	0.1	28.75
WATER+CO2	2019-10-18	16	0.12	30.37
WATER+CO2	2019-10-18	17	0.1	25.75
WATER+CO2	2019-10-18	18	0.14	38.56
