# Supplementary material for: Evaluation of effective quantum yields of photosystem II for CO2 leakage monitoring in carbon capture and storage sites
Source: PeerJ. 2021 Jan 28;9:e10652. doi: 10.7717/peerj.10652 (PMC7847708; doi:10.7717/peerj.10652)
Supplement: Supplemental Information 2 — Give data show raw value of leaf spectral reflectance values measured by sensors. The treatments included control, 10% CO2 (10% soil CO2), 20% CO2 (20% soil CO2), 40% CO2 (40% soil CO2), water stress (WATER) and water stress with 40% CO2 treatment (WATER + CO2). The measuring date was October 10, 13, 15, and 18 (i.e., 0, 3, 5, and 8 days after experiment onset, respectively), 2018. [file peerj-09-10652-s002.xlsx]

## Sheet: Sheet1
	2019-10-10						2019-10-13						2019-10-15						2019-10-18
wavelength	control	0.1	0.2	0.4	water	water=CO2	control	0.1	0.2	0.4	water	water*40%	control	0.1	0.2	0.4	water	water*40%	control	0.1	0.2	0.4	water	water*40%
R1280	0.451	0.491	0.471	0.485	0.472	0.449	0.505	0.514	0.501	0.476	0.476	0.496	0.479	0.478	0.421	0.503	0.484	0.494	0.527	0.456	0.476	0.428	0.481	0.494
R1450	0.129	0.104	0.111	0.103	0.092	0.097	0.11	0.117	0.131	0.11	0.103	0.104	0.115	0.093	0.077	0.139	0.098	0.127	0.125	0.097	0.1	0.084	0.113	0.106
R1280	0.486	0.492	0.488	0.477	0.512	0.483	0.436	0.516	0.441	0.467	0.482	0.469	0.481	0.491	0.461	0.502	0.51	0.49	0.494	0.446	0.462	0.441	0.499	0.461
R1450	0.081	0.102	0.103	0.114	0.113	0.121	0.064	0.129	0.097	0.099	0.105	0.1	0.082	0.138	0.085	0.121	0.126	0.104	0.126	0.08	0.096	0.081	0.126	0.081
R1280	0.495	0.527	0.529	0.482	0.498	0.475	0.453	0.481	0.469	0.424	0.425	0.478	0.472	0.463	0.492	0.479	0.497	0.476	0.466	0.458	0.45	0.462	0.506	0.47
R1450	0.109	0.116	0.115	0.101	0.098	0.114	0.077	0.117	0.114	0.107	0.082	0.081	0.09	0.122	0.13	0.14	0.111	0.115	0.076	0.099	0.078	0.09	0.109	0.083
R1280	0.446	0.536	0.438	0.477	0.478	0.459	0.443	0.469	0.459	0.473	0.485	0.466	0.499	0.531	0.348	0.437	0.487	0.529	0.527	0.462	0.399	0.428	0.496	0.457
R1450	0.071	0.134	0.09	0.092	0.123	0.093	0.075	0.099	0.102	0.107	0.086	0.103	0.123	0.131	0.082	0.087	0.125	0.125	0.131	0.112	0.068	0.09	0.11	0.078
R1280	0.462	0.492	0.535	0.476	0.405	0.482	0.469	0.466	0.495	0.546	0.456	0.502	0.53	0.501	0.445	0.481	0.498	0.494	0.487	0.504	0.459	0.436	0.516	0.467
R1450	0.085	0.113	0.127	0.123	0.069	0.12	0.107	0.112	0.101	0.165	0.098	0.149	0.144	0.105	0.105	0.108	0.1	0.13	0.1	0.14	0.071	0.074	0.126	0.08
R1280	0.519	0.554	0.479	0.457	0.501	0.47	0.488	0.482	0.457	0.524	0.534	0.495	0.473	0.509	0.473	0.52	0.51	0.499	0.494	0.477	0.459	0.466	0.497	0.477
R1450	0.133	0.108	0.092	0.096	0.136	0.091	0.12	0.113	0.085	0.104	0.124	0.135	0.075	0.109	0.092	0.145	0.126	0.147	0.092	0.115	0.101	0.093	0.095	0.086
R1280	0.47	0.496	0.487	0.502	0.453	0.498	0.456	0.438	0.45	0.462	0.513	0.501	0.508	0.473	0.44	0.494	0.513	0.506	0.548	0.453	0.427	0.442	0.486	0.527
R1450	0.128	0.115	0.092	0.1	0.108	0.11	0.119	0.093	0.094	0.092	0.123	0.112	0.117	0.106	0.072	0.124	0.122	0.113	0.123	0.092	0.066	0.099	0.131	0.143
R1280	0.459	0.464	0.466	0.528	0.441	0.496	0.438	0.482	0.498	0.476	0.494	0.489	0.531	0.489	0.471	0.476	0.473	0.5	0.483	0.464	0.484	0.453	0.48	0.501
R1450	0.086	0.102	0.098	0.14	0.079	0.097	0.088	0.125	0.119	0.119	0.111	0.107	0.14	0.105	0.085	0.115	0.092	0.115	0.084	0.09	0.084	0.106	0.092	0.123
R1280	0.481	0.414	0.483	0.486	0.456	0.476	0.433	0.478	0.504	0.457	0.466	0.465	0.445	0.507	0.465	0.454	0.485	0.491	0.455	0.443	0.427	0.446	0.488	0.537
R1450	0.114	0.078	0.107	0.108	0.092	0.091	0.079	0.11	0.131	0.093	0.106	0.105	0.074	0.125	0.074	0.097	0.108	0.127	0.069	0.086	0.082	0.091	0.102	0.146
R1280	0.493	0.45	0.427	0.465	0.465	0.48	0.472	0.484	0.488	0.53	0.463	0.478	0.466	0.484	0.472	0.476	0.395	0.479	0.509	0.472	0.447	0.459	0.502	0.485
R1450	0.104	0.079	0.083	0.11	0.088	0.113	0.102	0.124	0.11	0.152	0.095	0.105	0.104	0.129	0.126	0.11	0.061	0.126	0.098	0.122	0.091	0.11	0.135	0.134
R1280	0.478	0.459	0.466	0.457	0.496	0.451	0.494	0.457	0.479	0.456	0.462	0.41	0.483	0.465	0.494	0.452	0.442	0.453	0.499	0.51	0.417	0.47	0.48	0.469
R1450	0.1	0.104	0.107	0.106	0.127	0.085	0.116	0.106	0.114	0.096	0.114	0.066	0.121	0.107	0.12	0.094	0.096	0.096	0.112	0.107	0.081	0.09	0.099	0.118
R1280	0.504	0.489	0.472	0.475	0.499	0.485	0.49	0.495	0.471	0.503	0.435	0.491	0.486	0.457	0.538	0.441	0.478	0.477	0.471	0.468	0.439	0.455	0.474	0.583
R1450	0.127	0.089	0.088	0.093	0.105	0.098	0.102	0.118	0.102	0.124	0.09	0.121	0.125	0.101	0.135	0.068	0.101	0.1	0.102	0.074	0.085	0.083	0.094	0.101
R1280	0.491	0.475	0.444	0.474	0.465	0.479	0.48	0.487	0.509	0.46	0.514	0.459	0.48	0.487	0.488	0.496	0.479	0.485	0.428	0.422	0.485	0.453	0.505	0.463
R1450	0.12	0.113	0.088	0.105	0.102	0.098	0.103	0.127	0.098	0.113	0.14	0.103	0.114	0.127	0.091	0.134	0.101	0.096	0.085	0.087	0.086	0.084	0.14	0.091
R1280	0.484	0.507	0.497	0.485	0.444	0.499	0.445	0.437	0.505	0.463	0.447	0.491	0.466	0.491	0.491	0.514	0.466	0.505	0.511	0.467	0.496	0.454	0.468	0.482
R1450	0.107	0.114	0.102	0.118	0.097	0.093	0.074	0.074	0.135	0.096	0.09	0.106	0.116	0.096	0.095	0.131	0.1	0.122	0.125	0.104	0.114	0.087	0.09	0.099
R1280	0.449	0.492	0.504	0.425	0.492	0.473	0.459	0.447	0.488	0.465	0.47	0.496	0.476	0.492	0.49	0.515	0.469	0.477	0.494	0.457	0.449	0.488	0.474	0.482
R1450	0.079	0.125	0.099	0.084	0.138	0.092	0.079	0.102	0.088	0.128	0.094	0.126	0.111	0.126	0.093	0.113	0.109	0.112	0.127	0.099	0.077	0.105	0.123	0.094
R1280	0.458	0.45	0.478	0.459	0.487	0.497	0.458	0.479	0.449	0.459	0.482	0.454	0.477	0.426	0.49	0.512	0.48	0.486	0.52	0.452	0.459	0.432	0.486	0.501
R1450	0.102	0.099	0.096	0.095	0.12	0.105	0.079	0.111	0.1	0.112	0.122	0.073	0.097	0.078	0.107	0.112	0.105	0.129	0.126	0.072	0.078	0.075	0.144	0.159
R1280	0.477	0.468	0.467	0.471	0.482	0.473	0.503	0.44	0.481	0.487	0.459	0.435	0.458	0.489	0.468	0.435	0.487	0.497	0.518	0.448	0.51	0.424	0.458	0.477
R1450	0.115	0.107	0.103	0.113	0.114	0.106	0.103	0.078	0.109	0.107	0.091	0.082	0.102	0.101	0.119	0.07	0.093	0.107	0.122	0.072	0.122	0.061	0.099	0.124
R1280	0.451	0.475	0.457	0.465	0.471	0.464	0.462	0.457	0.492	0.53	0.461	0.499	0.479	0.446	0.451	0.48	0.49	0.502	0.458	0.419	0.455	0.421	0.543	0.458
R1450	0.076	0.113	0.083	0.091	0.093	0.093	0.099	0.113	0.162	0.151	0.105	0.123	0.1	0.087	0.075	0.14	0.119	0.117	0.101	0.08	0.086	0.072	0.147	0.096
R1280	0.463	0.468	0.481	0.498	0.505	0.492	0.452	0.454	0.447	0.478	0.486	0.442	0.479	0.47	0.432	0.439	0.505	0.467	0.48	0.502	0.466	0.423	0.501	0.486
R1450	0.118	0.111	0.11	0.143	0.142	0.114	0.073	0.129	0.116	0.11	0.109	0.09	0.101	0.109	0.074	0.091	0.121	0.094	0.1	0.096	0.074	0.066	0.128	0.134
R1280	0.499	0.495	0.509	0.49	0.459	0.478	0.465	0.487	0.506	0.499	0.472	0.451	0.489	0.488	0.446	0.544	0.51	0.505	0.475	0.506	0.455	0.445	0.471	0.504
R1450	0.108	0.133	0.166	0.11	0.117	0.093	0.094	0.124	0.118	0.131	0.126	0.124	0.101	0.11	0.149	0.146	0.131	0.113	0.092	0.091	0.067	0.081	0.09	0.109
R1280	0.484	0.497	0.493	0.482	0.485	0.489	0.447	0.441	0.473	0.481	0.47	0.441	0.474	0.465	0.503	0.554	0.466	0.454	0.484	0.484	0.447	0.441	0.453	0.505
R1450	0.09	0.086	0.084	0.106	0.089	0.115	0.085	0.085	0.081	0.123	0.097	0.072	0.099	0.098	0.111	0.169	0.088	0.07	0.123	0.115	0.062	0.078	0.082	0.091
R1280	0.46	0.468	0.508	0.498	0.55	0.484	0.46	0.422	0.491	0.483	0.459	0.457	0.518	0.444	0.498	0.511	0.505	0.424	0.494	0.42	0.451	0.476	0.453	0.511
R1450	0.1	0.116	0.134	0.093	0.118	0.101	0.107	0.07	0.124	0.128	0.094	0.084	0.118	0.088	0.097	0.134	0.143	0.081	0.123	0.078	0.066	0.105	0.078	0.097
R1280	0.473	0.491	0.434	0.49	0.473	0.521	0.504	0.45	0.452	0.47	0.434	0.467	0.499	0.465	0.487	0.507	0.49	0.477	0.463	0.45	0.433	0.423	0.48	0.503
R1450	0.123	0.125	0.097	0.126	0.092	0.12	0.112	0.081	0.123	0.097	0.091	0.104	0.117	0.08	0.105	0.117	0.108	0.122	0.095	0.112	0.059	0.063	0.122	0.092
R1280	0.493	0.483	0.514	0.5	0.444	0.474	0.496	0.451	0.437	0.501	0.446	0.491	0.529	0.519	0.498	0.487	0.496	0.475	0.519	0.495	0.484	0.42	0.5	0.51
R1450	0.133	0.105	0.113	0.12	0.115	0.134	0.092	0.092	0.077	0.13	0.076	0.099	0.134	0.1	0.102	0.105	0.123	0.111	0.109	0.138	0.127	0.061	0.1	0.099
R1280	0.466	0.461	0.48	0.469	0.453	0.441	0.488	0.487	0.48	0.486	0.46	0.511	0.448	0.493	0.512	0.437	0.48	0.484	0.436	0.467	0.453	0.485	0.507	0.474
R1450	0.087	0.106	0.107	0.109	0.097	0.085	0.127	0.126	0.1	0.122	0.093	0.133	0.078	0.104	0.123	0.092	0.104	0.116	0.066	0.107	0.098	0.102	0.102	0.127
R1280	0.483	0.475	0.467	0.465	0.466	0.456	0.488	0.454	0.483	0.482	0.456	0.48	0.488	0.48	0.395	0.52	0.475	0.443	0.499	0.464	0.466	0.505	0.454	0.506
R1450	0.112	0.127	0.108	0.103	0.1	0.079	0.105	0.09	0.142	0.123	0.108	0.132	0.128	0.118	0.078	0.13	0.093	0.083	0.093	0.09	0.091	0.108	0.123	0.1
R1280	0.503	0.451	0.435	0.466	0.419	0.449	0.488	0.476	0.472	0.526	0.489	0.444	0.43	0.522	0.472	0.508	0.475	0.527	0.507	0.484	0.478	0.469	0.506	0.445
R1450	0.111	0.103	0.083	0.099	0.08	0.107	0.105	0.109	0.107	0.141	0.091	0.093	0.079	0.123	0.105	0.107	0.096	0.133	0.124	0.101	0.089	0.125	0.149	0.088
R1280	0.48	0.434	0.45	0.458	0.485	0.473							0.45	0.471	0.468	0.466	0.512	0.503	0.437	0.477	0.431	0.429	0.481	0.506
R1450	0.102	0.085	0.089	0.116	0.094	0.082							0.091	0.13	0.093	0.103	0.113	0.119	0.074	0.119	0.073	0.079	0.12	0.092
R1280	0.446	0.465	0.434	0.446	0.495	0.47							0.463	0.502	0.503	0.499	0.543	0.51		0.478	0.435	0.456	0.478	0.519
R1450	0.074	0.123	0.105	0.108	0.116	0.095							0.103	0.133	0.143	0.121	0.125	0.123		0.11	0.062	0.095	0.094	0.109
R1280	0.506	0.429	0.481	0.486	0.452	0.466							0.481	0.475	0.493	0.492	0.471	0.493		0.51	0.454	0.457	0.448	0.512
R1450	0.121	0.084	0.108	0.084	0.111	0.118							0.106	0.084	0.095	0.107	0.099	0.119		0.113	0.067	0.083	0.1	0.109
R680	0.076	0.077	0.075	0.063	0.078	0.077	0.079	0.083	0.071	0.088	0.084	0.07	0.081	0.078	0.07	0.072	0.079	0.078	0.082	0.064	0.094	0.372	0.079	0.107
R800	0.499	0.572	0.534	0.556	0.554	0.523	0.585	0.598	0.569	0.564	0.563	0.576	0.558	0.575	0.498	0.566	0.58	0.564	0.595	0.522	0.547	0.512	0.551	0.572
R680	0.082	0.083	0.074	0.086	0.074	0.091	0.069	0.076	0.053	0.057	0.079	0.081	0.077	0.064	0.088	0.079	0.081	0.071	0.072	0.157	0.5	0.283	0.076	0.521
R800	0.573	0.572	0.55	0.55	0.578	0.554	0.529	0.586	0.505	0.533	0.564	0.544	0.58	0.555	0.55	0.582	0.591	0.574	0.555	0.521	0.533	0.535	0.57	0.554
R680	0.074	0.1	0.092	0.062	0.069	0.083	0.075	0.072	0.059	0.069	0.069	0.081	0.075	0.08	0.07	0.069	0.076	0.066	0.077	0.138	0.501	0.185	0.077	0.522
R800	0.559	0.616	0.61	0.545	0.565	0.552	0.548	0.551	0.541	0.5	0.499	0.59	0.559	0.534	0.533	0.545	0.567	0.546	0.559	0.53	0.535	0.544	0.577	0.556
R680	0.079	0.093	0.057	0.088	0.081	0.085	0.071	0.104	0.072	0.078	0.073	0.082	0.076	0.077	0.056	0.063	0.083	0.093	0.078	0.097	0.086	0.419	0.074	0.505
R800	0.536	0.612	0.504	0.568	0.54	0.543	0.53	0.557	0.536	0.558	0.579	0.548	0.568	0.602	0.359	0.519	0.562	0.613	0.589	0.531	0.488	0.488	0.572	0.537
R680	0.088	0.083	0.075	0.076	0.072	0.085	0.078	0.081	0.107	0.082	0.071	0.069	0.082	0.086	0.065	0.064	0.069	0.065	0.082	0.065	0.068	0.312	0.068	0.194
R800	0.55	0.564	0.595	0.547	0.487	0.547	0.551	0.547	0.587	0.617	0.538	0.572	0.604	0.589	0.485	0.556	0.575	0.558	0.562	0.562	0.545	0.522	0.577	0.566
R680	0.085	0.094	0.092	0.073	0.088	0.071	0.077	0.063	0.091	0.078	0.081	0.067	0.085	0.096	0.082	0.074	0.082	0.08	0.063	0.083	0.081	0.106	0.072	0.168
R800	0.576	0.644	0.567	0.528	0.565	0.55	0.562	0.557	0.553	0.606	0.618	0.558	0.577	0.599	0.557	0.594	0.582	0.566	0.561	0.551	0.526	0.542	0.578	0.571
R680	0.073	0.095	0.09	0.077	0.069	0.076	0.073	0.086	0.071	0.072	0.084	0.068	0.09	0.085	0.075	0.09	0.076	0.069	0.078	0.069	0.105	0.457	0.073	0.515
R800	0.535	0.576	0.578	0.583	0.514	0.573	0.526	0.516	0.534	0.549	0.587	0.573	0.594	0.559	0.54	0.573	0.592	0.58	0.61	0.523	0.512	0.499	0.547	0.59
R680	0.079	0.074	0.072	0.09	0.076	0.102	0.105	0.061	0.079	0.072	0.073	0.09	0.073	0.072	0.109	0.079	0.075	0.084	0.079	0.149	0.541	0.414	0.082	0.512
R800	0.543	0.535	0.533	0.591	0.528	0.585	0.516	0.55	0.578	0.547	0.572	0.568	0.597	0.562	0.572	0.544	0.563	0.585	0.571	0.543	0.594	0.512	0.557	0.577
R680	0.08	0.071	0.086	0.077	0.081	0.099	0.07	0.074	0.083	0.089	0.076	0.083	0.062	0.08	0.112	0.076	0.077	0.074	0.088	0.394	0.076	0.467	0.096	0.524
R800	0.547	0.503	0.552	0.563	0.536	0.563	0.519	0.558	0.574	0.555	0.542	0.54	0.535	0.584	0.58	0.539	0.558	0.559	0.557	0.523	0.491	0.511	0.575	0.6
R680	0.084	0.075	0.074	0.079	0.069	0.083	0.073	0.061	0.061	0.073	0.078	0.092	0.065	0.079	0.057	0.074	0.062	0.082	0.075	0.101	0.094	0.076	0.076	0.147
R800	0.565	0.533	0.501	0.539	0.545	0.552	0.553	0.546	0.565	0.592	0.548	0.566	0.537	0.561	0.538	0.555	0.476	0.553	0.586	0.539	0.515	0.522	0.57	0.546
R680	0.079	0.07	0.076	0.069	0.081	0.079	0.076	0.079	0.07	0.092	0.07	0.074	0.079	0.09	0.062	0.08	0.084	0.096	0.083	0.087	0.085	0.461	0.08	0.092
R800	0.55	0.531	0.53	0.518	0.563	0.538	0.57	0.526	0.55	0.55	0.536	0.507	0.554	0.549	0.56	0.536	0.506	0.541	0.569	0.589	0.468	0.521	0.553	0.527
R680	0.075	0.076	0.076	0.088	0.081	0.086	0.089	0.081	0.065	0.064	0.08	0.08	0.085	0.054	0.064	0.117	0.079	0.08	0.08	0.063	0.097	0.475	0.063	0.582
R800	0.566	0.571	0.552	0.562	0.579	0.563	0.577	0.574	0.545	0.569	0.524	0.568	0.56	0.517	0.599	0.548	0.562	0.562	0.538	0.558	0.51	0.533	0.544	0.688
R680	0.077	0.083	0.064	0.092	0.072	0.085	0.086	0.07	0.092	0.067	0.067	0.082	0.08	0.066	0.073	0.067	0.058	0.076	0.074	0.077	0.528	0.467	0.073	0.082
R800	0.559	0.546	0.516	0.546	0.54	0.562	0.564	0.555	0.601	0.531	0.579	0.535	0.559	0.555	0.573	0.559	0.55	0.575	0.501	0.49	0.563	0.526	0.564	0.541
R680	0.083	0.067	0.08	0.07	0.072	0.09	0.064	0.061	0.072	0.065	0.073	0.064	0.069	0.068	0.087	0.085	0.071	0.079	0.087	0.211	0.107	0.13	0.064	0.501
R800	0.553	0.572	0.568	0.545	0.519	0.585	0.535	0.53	0.572	0.544	0.535	0.57	0.539	0.579	0.561	0.598	0.542	0.578	0.576	0.543	0.566	0.536	0.539	0.556
R680	0.068	0.078	0.092	0.086	0.07	0.087	0.075	0.075	0.079	0.059	0.063	0.073	0.087	0.071	0.087	0.092	0.067	0.069	0.086	0.176	0.135	0.134	0.071	0.508
R800	0.537	0.558	0.581	0.503	0.553	0.539	0.561	0.529	0.58	0.521	0.545	0.57	0.558	0.559	0.587	0.609	0.509	0.549	0.555	0.531	0.54	0.569	0.541	0.565
R680	0.08	0.062	0.084	0.064	0.073	0.076	0.085	0.071	0.065	0.068	0.059	0.067	0.07	0.069	0.077	0.076	0.079	0.077	0.088	0.083	0.157	0.485	0.085	0.528
R800	0.536	0.515	0.561	0.522	0.547	0.57	0.551	0.549	0.526	0.528	0.546	0.557	0.556	0.513	0.572	0.599	0.533	0.555	0.591	0.535	0.546	0.502	0.557	0.559
R680	0.081	0.074	0.07	0.082	0.073	0.09	0.089	0.09	0.075	0.074	0.075	0.068	0.077	0.078	0.066	0.079	0.067	0.071	0.081	0.083	0.107	0.488	0.064	0.093
R800	0.542	0.538	0.534	0.541	0.551	0.547	0.59	0.538	0.558	0.571	0.537	0.515	0.542	0.574	0.535	0.548	0.568	0.577	0.585	0.542	0.579	0.506	0.524	0.538
R680	0.068	0.079	0.068	0.099	0.065	0.084	0.071	0.063	0.068	0.07	0.067	0.089	0.082	0.065	0.084	0.083	0.079	0.083	0.078	0.453	0.086	0.112	0.074	0.088
R800	0.537	0.544	0.532	0.555	0.543	0.541	0.542	0.525	0.552	0.6	0.534	0.571	0.563	0.528	0.539	0.551	0.562	0.58	0.527	0.491	0.527	0.511	0.604	0.534
R680	0.093	0.079	0.071	0.073	0.087	0.075	0.061	0.079	0.069	0.07	0.06	0.06	0.072	0.062	0.073	0.07	0.083	0.093	0.084	0.095	0.518	0.122	0.082	0.524
R800	0.538	0.534	0.546	0.554	0.565	0.559	0.531	0.525	0.519	0.557	0.557	0.521	0.566	0.548	0.523	0.521	0.591	0.562	0.559	0.587	0.559	0.498	0.566	0.552
R680	0.085	0.066	0.078	0.076	0.07	0.083	0.066	0.072	0.063	0.061	0.061	0.055	0.083	0.079	0.062	0.096	0.073	0.074	0.066	0.062	0.505	0.187	0.065	0.557
R800	0.571	0.548	0.566	0.552	0.528	0.559	0.547	0.55	0.576	0.563	0.54	0.511	0.576	0.547	0.518	0.622	0.582	0.581	0.544	0.581	0.545	0.525	0.549	0.594
R680	0.069	0.072	0.075	0.074	0.069	0.088	0.067	0.078	0.073	0.073	0.071	0.058	0.079	0.121	0.065	0.066	0.065	0.103	0.065	0.073	0.486	0.205	0.095	0.234
R800	0.574	0.578	0.579	0.562	0.558	0.559	0.529	0.529	0.564	0.55	0.555	0.531	0.559	0.554	0.575	0.616	0.553	0.564	0.511	0.549	0.543	0.517	0.555	0.591
R680	0.064	0.073	0.07	0.082	0.082	0.07	0.065	0.095	0.093	0.078	0.069	0.074	0.085	0.114	0.074	0.076	0.079	0.078	0.071	0.09	0.473	0.105	0.078	0.338
R800	0.528	0.53	0.572	0.59	0.629	0.556	0.529	0.514	0.569	0.558	0.538	0.55	0.597	0.535	0.592	0.584	0.573	0.461	0.552	0.495	0.549	0.542	0.534	0.588
R680	0.064	0.083	0.078	0.08	0.087	0.074	0.085	0.067	0.08	0.078	0.073	0.063	0.088	0.096	0.075	0.073	0.074	0.079	0.061	0.09	0.49	0.172	0.083	0.24
R800	0.532	0.565	0.508	0.562	0.56	0.586	0.588	0.535	0.529	0.548	0.518	0.539	0.577	0.577	0.57	0.581	0.567	0.556	0.53	0.517	0.532	0.522	0.536	0.585
R680	0.07	0.081	0.074	0.088	0.064	0.068	0.067	0.07	0.06	0.063	0.074	0.074	0.066	0.075	0.081	0.071	0.067	0.084	0.08	0.102	0.088	0.171	0.062	0.349
R800	0.55	0.55	0.584	0.57	0.501	0.536	0.58	0.53	0.515	0.57	0.548	0.571	0.595	0.608	0.589	0.563	0.566	0.551	0.59	0.561	0.547	0.515	0.572	0.587
R680	0.069	0.079	0.07	0.074	0.067	0.066	0.067	0.069	0.069	0.074	0.061	0.079	0.081	0.066	0.073	0.06	0.058	0.067	0.065	0.265	0.083	0.11	0.067	0.134
R800	0.537	0.535	0.534	0.541	0.519	0.517	0.551	0.552	0.556	0.557	0.538	0.584	0.546	0.572	0.587	0.462	0.508	0.554	0.52	0.539	0.525	0.559	0.578	0.532
R680	0.072	0.077	0.071	0.075	0.084	0.075	0.077	0.094	0.082	0.08	0.06	0.067	0.069	0.065	0.072	0.071	0.079	0.075	0.083	0.265	0.092	0.1	0.061	0.178
R800	0.556	0.538	0.541	0.54	0.544	0.549	0.574	0.535	0.553	0.553	0.525	0.541	0.543	0.546	0.459	0.59	0.551	0.509	0.567	0.544	0.547	0.581	0.504	0.586
R680	0.085	0.067	0.081	0.072	0.06	0.059	0.075	0.075	0.074	0.066	0.067	0.061	0.068	0.069	0.088	0.073	0.078	0.076	0.065	0.09	0.545	0.109	0.083	0.49
R800	0.579	0.506	0.517	0.536	0.486	0.515	0.575	0.549	0.558	0.593	0.572	0.524	0.508	0.596	0.527	0.593	0.554	0.608	0.544	0.56	0.572	0.536	0.569	0.515
R680	0.065	0.08	0.079	0.078	0.072	0.07							0.07	0.068	0.055	0.089	0.085	0.077	0.078	0.088	0.483	0.149	0.087	0.232
R800	0.555	0.518	0.524	0.528	0.557	0.554							0.534	0.544	0.536	0.556	0.597	0.579	0.529	0.545	0.521	0.507	0.538	0.592
R680	0.079	0.074	0.086	0.079	0.07	0.066							0.07	0.074	0.071	0.092	0.091	0.086		0.073	0.248	0.229	0.076	0.35
R800	0.541	0.524	0.516	0.52	0.558	0.54							0.533	0.577	0.566	0.579	0.627	0.59		0.546	0.548	0.539	0.56	0.588
R680	0.071	0.068	0.082	0.069	0.084	0.059							0.084	0.073	0.069	0.067	0.067	0.089		0.092	0.23	0.081	0.065	0.399
R800	0.574	0.505	0.56	0.58	0.517	0.525							0.572	0.562	0.571	0.576	0.556	0.564		0.584	0.561	0.549	0.513	0.589
R470	0.082	0.084	0.078	0.057	0.087	0.077	0.085	0.091	0.076	0.103	0.101	0.075	0.087	0.085	0.068	0.082	0.095	0.092	0.098	0.059	0.083	0.122	0.099	0.099
R670	0.071	0.072	0.07	0.055	0.072	0.07	0.074	0.079	0.066	0.084	0.079	0.066	0.076	0.074	0.066	0.069	0.075	0.076	0.079	0.061	0.088	0.363	0.076	0.104
R800	0.499	0.572	0.534	0.556	0.554	0.523	0.585	0.598	0.569	0.564	0.563	0.576	0.558	0.575	0.498	0.566	0.58	0.564	0.595	0.522	0.547	0.512	0.551	0.572
R470	0.093	0.089	0.075	0.095	0.076	0.087	0.069	0.087	0.054	0.06	0.085	0.098	0.076	0.064	0.076	0.092	0.098	0.077	0.081	0.081	0.176	0.125	0.093	0.158
R670	0.076	0.076	0.068	0.08	0.068	0.083	0.063	0.073	0.049	0.053	0.075	0.079	0.071	0.06	0.077	0.077	0.078	0.069	0.067	0.146	0.499	0.278	0.072	0.518
R800	0.573	0.572	0.55	0.55	0.578	0.554	0.529	0.586	0.505	0.533	0.564	0.544	0.58	0.555	0.55	0.582	0.591	0.574	0.555	0.521	0.533	0.535	0.57	0.554
R470	0.076	0.116	0.102	0.059	0.066	0.085	0.076	0.077	0.06	0.073	0.072	0.083	0.09	0.093	0.078	0.081	0.085	0.068	0.084	0.101	0.204	0.108	0.086	0.172
R670	0.068	0.094	0.086	0.056	0.062	0.076	0.069	0.067	0.054	0.063	0.064	0.076	0.072	0.076	0.067	0.065	0.071	0.062	0.073	0.141	0.498	0.182	0.073	0.519
R800	0.559	0.616	0.61	0.545	0.565	0.552	0.548	0.551	0.541	0.5	0.499	0.59	0.559	0.534	0.533	0.545	0.567	0.546	0.559	0.53	0.535	0.544	0.577	0.556
R470	0.083	0.107	0.053	0.098	0.078	0.093	0.073	0.09	0.084	0.085	0.072	0.098	0.085	0.083	0.081	0.069	0.088	0.115	0.085	0.088	0.072	0.131	0.082	0.139
R670	0.074	0.088	0.05	0.081	0.074	0.078	0.065	0.096	0.069	0.074	0.069	0.078	0.072	0.073	0.054	0.06	0.078	0.09	0.072	0.094	0.078	0.411	0.069	0.502
R800	0.536	0.612	0.504	0.568	0.54	0.543	0.53	0.557	0.536	0.558	0.579	0.548	0.568	0.602	0.359	0.519	0.562	0.613	0.589	0.531	0.488	0.488	0.572	0.537
R470	0.092	0.088	0.077	0.076	0.069	0.088	0.085	0.098	0.131	0.095	0.069	0.072	0.083	0.094	0.079	0.073	0.068	0.064	0.083	0.065	0.061	0.123	0.071	0.131
R670	0.083	0.077	0.068	0.068	0.066	0.078	0.072	0.078	0.104	0.08	0.065	0.065	0.075	0.083	0.064	0.062	0.064	0.059	0.075	0.061	0.064	0.312	0.063	0.191
R800	0.55	0.564	0.595	0.547	0.487	0.547	0.551	0.547	0.587	0.617	0.538	0.572	0.604	0.589	0.485	0.556	0.575	0.558	0.562	0.562	0.545	0.522	0.577	0.566
R470	0.091	0.107	0.105	0.074	0.086	0.067	0.08	0.068	0.104	0.084	0.085	0.067	0.092	0.119	0.076	0.089	0.088	0.082	0.066	0.084	0.071	0.086	0.071	0.134
R670	0.079	0.088	0.087	0.067	0.082	0.063	0.071	0.06	0.086	0.076	0.076	0.061	0.082	0.095	0.074	0.072	0.076	0.074	0.058	0.077	0.076	0.101	0.067	0.166
R800	0.576	0.644	0.567	0.528	0.565	0.55	0.562	0.557	0.553	0.606	0.618	0.558	0.577	0.599	0.557	0.594	0.582	0.566	0.561	0.551	0.526	0.542	0.578	0.571
R470	0.079	0.105	0.102	0.08	0.068	0.073	0.079	0.083	0.078	0.086	0.098	0.073	0.102	0.088	0.07	0.108	0.082	0.075	0.084	0.063	0.076	0.176	0.08	0.129
R670	0.068	0.089	0.085	0.071	0.062	0.068	0.068	0.083	0.067	0.071	0.081	0.065	0.086	0.078	0.068	0.086	0.072	0.067	0.074	0.065	0.096	0.454	0.069	0.51
R800	0.535	0.576	0.578	0.583	0.514	0.573	0.526	0.516	0.534	0.549	0.587	0.573	0.594	0.559	0.54	0.573	0.592	0.58	0.61	0.523	0.512	0.499	0.547	0.59
R470	0.078	0.076	0.076	0.095	0.085	0.116	0.078	0.063	0.084	0.09	0.081	0.105	0.076	0.078	0.098	0.09	0.086	0.095	0.081	0.079	0.171	0.166	0.079	0.13
R670	0.072	0.067	0.066	0.083	0.071	0.096	0.097	0.058	0.075	0.071	0.07	0.086	0.068	0.067	0.101	0.074	0.071	0.08	0.073	0.138	0.542	0.403	0.076	0.507
R800	0.543	0.535	0.533	0.591	0.528	0.585	0.516	0.55	0.578	0.547	0.572	0.568	0.597	0.562	0.572	0.544	0.563	0.585	0.571	0.543	0.594	0.512	0.557	0.577
R470	0.081	0.073	0.097	0.069	0.094	0.114	0.071	0.08	0.09	0.099	0.09	0.102	0.063	0.093	0.099	0.095	0.084	0.093	0.094	0.144	0.072	0.18	0.111	0.129
R670	0.074	0.065	0.08	0.067	0.076	0.093	0.065	0.069	0.077	0.083	0.072	0.081	0.057	0.078	0.11	0.074	0.072	0.072	0.085	0.395	0.069	0.463	0.089	0.519
R800	0.547	0.503	0.552	0.563	0.536	0.563	0.519	0.558	0.574	0.555	0.542	0.54	0.535	0.584	0.58	0.539	0.558	0.559	0.557	0.523	0.491	0.511	0.575	0.6
R470	0.084	0.074	0.076	0.087	0.072	0.085	0.075	0.06	0.061	0.077	0.087	0.102	0.068	0.083	0.059	0.07	0.06	0.096	0.081	0.094	0.086	0.068	0.083	0.098
R670	0.077	0.069	0.068	0.072	0.063	0.075	0.067	0.057	0.056	0.07	0.075	0.088	0.06	0.072	0.053	0.069	0.056	0.078	0.07	0.1	0.089	0.071	0.072	0.143
R800	0.565	0.533	0.501	0.539	0.545	0.552	0.553	0.546	0.565	0.592	0.548	0.566	0.537	0.561	0.538	0.555	0.476	0.553	0.586	0.539	0.515	0.522	0.57	0.546
R470	0.083	0.067	0.072	0.068	0.087	0.08	0.086	0.079	0.069	0.105	0.083	0.075	0.091	0.108	0.064	0.077	0.077	0.117	0.093	0.086	0.064	0.142	0.092	0.072
R470	0.073	0.064	0.068	0.062	0.076	0.072	0.072	0.075	0.065	0.086	0.069	0.07	0.075	0.085	0.059	0.078	0.076	0.09	0.078	0.082	0.077	0.456	0.077	0.087
R670	0.55	0.531	0.53	0.518	0.563	0.538	0.57	0.526	0.55	0.55	0.536	0.507	0.554	0.549	0.56	0.536	0.506	0.541	0.569	0.589	0.468	0.521	0.553	0.527
R800	0.08	0.074	0.077	0.088	0.08	0.092	0.097	0.092	0.076	0.072	0.088	0.085	0.099	0.053	0.063	0.096	0.078	0.093	0.095	0.062	0.072	0.146	0.065	0.276
R470	0.069	0.07	0.07	0.081	0.074	0.079	0.086	0.079	0.063	0.063	0.075	0.076	0.082	0.052	0.06	0.108	0.074	0.078	0.077	0.058	0.087	0.47	0.059	0.569
R670	0.566	0.571	0.552	0.562	0.579	0.563	0.577	0.574	0.545	0.569	0.524	0.568	0.56	0.517	0.599	0.548	0.562	0.562	0.538	0.558	0.51	0.533	0.544	0.688
R800	0.086	0.081	0.06	0.101	0.072	0.092	0.096	0.077	0.107	0.072	0.073	0.08	0.078	0.066	0.08	0.063	0.06	0.085	0.086	0.08	0.121	0.142	0.086	0.075
R470	0.071	0.076	0.057	0.086	0.065	0.078	0.082	0.066	0.087	0.063	0.065	0.08	0.075	0.062	0.069	0.061	0.054	0.073	0.07	0.073	0.527	0.461	0.072	0.077
R670	0.559	0.546	0.516	0.546	0.54	0.562	0.564	0.555	0.601	0.531	0.579	0.535	0.559	0.555	0.573	0.559	0.55	0.575	0.501	0.49	0.563	0.526	0.564	0.541
R800	0.094	0.065	0.088	0.071	0.074	0.092	0.058	0.062	0.071	0.064	0.08	0.067	0.069	0.074	0.108	0.097	0.078	0.086	0.101	0.124	0.095	0.091	0.064	0.265
R470	0.079	0.06	0.074	0.063	0.066	0.082	0.058	0.057	0.066	0.06	0.069	0.06	0.063	0.066	0.084	0.084	0.066	0.076	0.083	0.205	0.1	0.127	0.058	0.495
R670	0.553	0.572	0.568	0.545	0.519	0.585	0.535	0.53	0.572	0.544	0.535	0.57	0.539	0.579	0.561	0.598	0.542	0.578	0.576	0.543	0.566	0.536	0.539	0.556
R800	0.068	0.083	0.102	0.097	0.072	0.088	0.076	0.074	0.082	0.065	0.062	0.075	0.107	0.07	0.102	0.096	0.076	0.071	0.105	0.119	0.102	0.106	0.083	0.276
R470	0.062	0.072	0.085	0.08	0.064	0.08	0.07	0.069	0.074	0.057	0.057	0.067	0.083	0.068	0.084	0.085	0.063	0.065	0.081	0.168	0.134	0.132	0.069	0.499
R670	0.537	0.558	0.581	0.503	0.553	0.539	0.561	0.529	0.58	0.521	0.545	0.57	0.558	0.559	0.587	0.609	0.509	0.549	0.555	0.531	0.54	0.569	0.541	0.565
R800	0.079	0.059	0.09	0.06	0.074	0.077	0.09	0.073	0.069	0.071	0.066	0.067	0.072	0.073	0.084	0.09	0.092	0.091	0.107	0.07	0.087	0.147	0.104	0.217
R470	0.073	0.056	0.078	0.057	0.066	0.069	0.08	0.066	0.062	0.064	0.057	0.061	0.065	0.066	0.073	0.074	0.075	0.074	0.084	0.073	0.156	0.484	0.081	0.528
R670	0.536	0.515	0.561	0.522	0.547	0.57	0.551	0.549	0.526	0.528	0.546	0.557	0.556	0.513	0.572	0.599	0.533	0.555	0.591	0.535	0.546	0.502	0.557	0.559
R800	0.089	0.075	0.069	0.09	0.076	0.095	0.098	0.107	0.076	0.084	0.078	0.074	0.081	0.085	0.06	0.087	0.065	0.075	0.091	0.072	0.082	0.137	0.068	0.073
R470	0.075	0.067	0.063	0.075	0.067	0.082	0.085	0.087	0.069	0.072	0.07	0.065	0.072	0.073	0.06	0.073	0.063	0.067	0.074	0.075	0.096	0.486	0.06	0.088
R670	0.542	0.538	0.534	0.541	0.551	0.547	0.59	0.538	0.558	0.571	0.537	0.515	0.542	0.574	0.535	0.548	0.568	0.577	0.585	0.542	0.579	0.506	0.524	0.538
R800	0.062	0.087	0.068	0.117	0.064	0.09	0.078	0.068	0.073	0.076	0.077	0.099	0.088	0.059	0.074	0.095	0.079	0.095	0.094	0.125	0.074	0.086	0.085	0.081
R470	0.061	0.074	0.061	0.092	0.058	0.077	0.07	0.059	0.064	0.069	0.065	0.085	0.077	0.061	0.081	0.077	0.074	0.079	0.074	0.449	0.084	0.101	0.07	0.083
R670	0.537	0.544	0.532	0.555	0.543	0.541	0.542	0.525	0.552	0.6	0.534	0.571	0.563	0.528	0.539	0.551	0.562	0.58	0.527	0.491	0.527	0.511	0.604	0.534
R800	0.113	0.081	0.07	0.07	0.1	0.073	0.058	0.086	0.081	0.077	0.064	0.059	0.07	0.059	0.08	0.067	0.1	0.103	0.094	0.109	0.135	0.084	0.09	0.219
R470	0.089	0.073	0.064	0.065	0.082	0.068	0.055	0.076	0.068	0.068	0.058	0.056	0.067	0.057	0.071	0.066	0.08	0.086	0.08	0.093	0.514	0.115	0.078	0.524
R670	0.538	0.534	0.546	0.554	0.565	0.559	0.531	0.525	0.519	0.557	0.557	0.521	0.566	0.548	0.523	0.521	0.591	0.562	0.559	0.587	0.559	0.498	0.566	0.552
R800	0.091	0.064	0.076	0.074	0.072	0.079	0.07	0.072	0.068	0.067	0.067	0.057	0.093	0.083	0.07	0.108	0.082	0.081	0.071	0.06	0.118	0.086	0.064	0.239
R470	0.079	0.059	0.07	0.069	0.064	0.074	0.062	0.068	0.06	0.058	0.059	0.051	0.079	0.074	0.059	0.095	0.07	0.07	0.061	0.057	0.499	0.184	0.059	0.558
R670	0.571	0.548	0.566	0.552	0.528	0.559	0.547	0.55	0.576	0.563	0.54	0.511	0.576	0.547	0.518	0.622	0.582	0.581	0.544	0.581	0.545	0.525	0.549	0.594
R800	0.07	0.073	0.076	0.073	0.067	0.089	0.074	0.078	0.08	0.083	0.085	0.063	0.09	0.096	0.067	0.073	0.065	0.09	0.068	0.07	0.162	0.084	0.105	0.136
R470	0.062	0.066	0.068	0.067	0.063	0.082	0.064	0.073	0.069	0.071	0.07	0.055	0.076	0.11	0.06	0.065	0.059	0.097	0.06	0.07	0.484	0.203	0.09	0.229
R470	0.574	0.578	0.579	0.562	0.558	0.559	0.529	0.529	0.564	0.55	0.555	0.531	0.559	0.554	0.575	0.616	0.553	0.564	0.511	0.549	0.543	0.517	0.555	0.591
R670	0.064	0.072	0.064	0.08	0.084	0.064	0.069	0.081	0.122	0.088	0.068	0.085	0.097	0.096	0.075	0.08	0.094	0.07	0.074	0.072	0.16	0.079	0.071	0.15
R800	0.058	0.066	0.061	0.075	0.074	0.061	0.061	0.091	0.092	0.076	0.063	0.07	0.081	0.106	0.069	0.07	0.077	0.074	0.066	0.084	0.469	0.1	0.071	0.337
R470	0.528	0.53	0.572	0.59	0.629	0.556	0.529	0.514	0.569	0.558	0.538	0.55	0.597	0.535	0.592	0.584	0.573	0.461	0.552	0.495	0.549	0.542	0.534	0.588
R670	0.062	0.086	0.082	0.08	0.097	0.073	0.091	0.068	0.085	0.088	0.088	0.069	0.104	0.106	0.084	0.069	0.083	0.082	0.065	0.069	0.195	0.082	0.102	0.135
R800	0.057	0.077	0.071	0.072	0.081	0.067	0.08	0.063	0.074	0.076	0.072	0.06	0.084	0.091	0.071	0.065	0.069	0.077	0.057	0.085	0.486	0.167	0.08	0.24
R470	0.532	0.565	0.508	0.562	0.56	0.586	0.588	0.535	0.529	0.548	0.518	0.539	0.577	0.577	0.57	0.581	0.567	0.556	0.53	0.517	0.532	0.522	0.536	0.585
R670	0.068	0.085	0.074	0.092	0.062	0.066	0.07	0.073	0.058	0.071	0.079	0.072	0.074	0.072	0.092	0.073	0.074	0.073	0.08	0.08	0.077	0.081	0.071	0.121
R800	0.064	0.075	0.068	0.081	0.057	0.061	0.063	0.066	0.054	0.061	0.069	0.067	0.062	0.071	0.08	0.067	0.064	0.082	0.074	0.097	0.084	0.17	0.06	0.35
R470	0.55	0.55	0.584	0.57	0.501	0.536	0.58	0.53	0.515	0.57	0.548	0.571	0.595	0.608	0.589	0.563	0.566	0.551	0.59	0.561	0.547	0.515	0.572	0.587
R670	0.066	0.079	0.068	0.073	0.065	0.063	0.067	0.071	0.079	0.083	0.066	0.087	0.085	0.067	0.071	0.066	0.068	0.064	0.064	0.089	0.078	0.098	0.07	0.095
R800	0.063	0.073	0.063	0.067	0.061	0.058	0.062	0.066	0.066	0.072	0.06	0.076	0.077	0.061	0.069	0.055	0.053	0.061	0.06	0.269	0.081	0.107	0.063	0.126
R470	0.537	0.535	0.534	0.541	0.519	0.517	0.551	0.552	0.556	0.557	0.538	0.584	0.546	0.572	0.587	0.462	0.508	0.554	0.52	0.539	0.525	0.559	0.578	0.532
R670	0.065	0.08	0.068	0.076	0.092	0.076	0.072	0.083	0.095	0.102	0.066	0.071	0.076	0.061	0.131	0.073	0.089	0.091	0.08	0.096	0.095	0.087	0.066	0.124
R800	0.064	0.07	0.063	0.068	0.078	0.067	0.07	0.092	0.078	0.08	0.058	0.063	0.064	0.06	0.072	0.067	0.076	0.073	0.077	0.268	0.091	0.096	0.058	0.177
R470	0.556	0.538	0.541	0.54	0.544	0.549	0.574	0.535	0.553	0.553	0.525	0.541	0.543	0.546	0.459	0.59	0.551	0.509	0.567	0.544	0.547	0.581	0.504	0.586
R670	0.091	0.064	0.088	0.07	0.059	0.054	0.072	0.074	0.086	0.071	0.067	0.059	0.076	0.071	0.106	0.082	0.082	0.084	0.07	0.075	0.251	0.116	0.091	0.2
R800	0.079	0.061	0.074	0.065	0.054	0.051	0.07	0.068	0.071	0.062	0.062	0.056	0.064	0.065	0.084	0.071	0.074	0.073	0.06	0.083	0.545	0.105	0.081	0.489
R470	0.579	0.506	0.517	0.536	0.486	0.515	0.575	0.549	0.558	0.593	0.572	0.524	0.508	0.596	0.527	0.593	0.554	0.608	0.544	0.56	0.572	0.536	0.569	0.515
R670	0.063	0.082	0.08	0.079	0.075	0.068							0.073	0.077	0.056	0.109	0.097	0.087	0.079	0.076	0.206	0.086	0.091	0.137
R800	0.059	0.074	0.072	0.071	0.067	0.062							0.066	0.067	0.05	0.086	0.081	0.075	0.071	0.081	0.482	0.143	0.086	0.228
R470	0.555	0.518	0.524	0.528	0.557	0.554							0.534	0.544	0.536	0.556	0.597	0.579	0.529	0.545	0.521	0.507	0.538	0.592
R670	0.078	0.072	0.089	0.078	0.07	0.061							0.076	0.085	0.073	0.111	0.107	0.088		0.069	0.13	0.138	0.079	0.153
R800	0.073	0.068	0.078	0.07	0.063	0.058							0.065	0.071	0.067	0.087	0.087	0.08		0.069	0.249	0.233	0.069	0.351
R470	0.541	0.524	0.516	0.52	0.558	0.54							0.533	0.577	0.566	0.579	0.627	0.59		0.546	0.548	0.539	0.56	0.588
R670	0.069	0.066	0.086	0.063	0.089	0.054							0.088	0.071	0.076	0.067	0.074	0.108		0.086	0.125	0.075	0.068	0.162
R800	0.064	0.062	0.075	0.061	0.077	0.052							0.078	0.068	0.067	0.062	0.065	0.086		0.085	0.23	0.074	0.062	0.398
R531	0.142	0.147	0.137	0.12	0.138	0.145	0.147	0.165	0.137	0.165	0.149	0.167	0.168	0.131	0.191	0.161	0.153	0.187	0.173	0.113	0.151	0.285	0.144	0.16
R570	0.13	0.135	0.126	0.109	0.127	0.133	0.136	0.157	0.126	0.151	0.136	0.155	0.155	0.126	0.187	0.149	0.14	0.178	0.164	0.109	0.147	0.317	0.135	0.16
R531	0.143	0.165	0.138	0.148	0.132	0.189	0.14	0.152	0.11	0.112	0.151	0.154	0.158	0.136	0.203	0.163	0.169	0.171	0.157	0.148	0.338	0.305	0.133	0.393
R570	0.131	0.154	0.127	0.136	0.121	0.177	0.131	0.143	0.101	0.103	0.143	0.145	0.147	0.128	0.19	0.154	0.157	0.163	0.146	0.154	0.42	0.331	0.123	0.499
R531	0.134	0.17	0.162	0.109	0.136	0.17	0.162	0.143	0.118	0.127	0.129	0.171	0.131	0.146	0.145	0.149	0.151	0.137	0.178	0.327	0.447	0.236	0.153	0.397
R570	0.123	0.156	0.15	0.099	0.126	0.157	0.152	0.131	0.107	0.115	0.12	0.158	0.12	0.134	0.134	0.138	0.139	0.128	0.169	0.361	0.516	0.248	0.146	0.497
R531	0.148	0.16	0.106	0.16	0.148	0.159	0.155	0.251	0.149	0.156	0.151	0.161	0.162	0.129	0.118	0.131	0.155	0.184	0.166	0.19	0.221	0.22	0.15	0.377
R570	0.137	0.148	0.097	0.146	0.137	0.146	0.144	0.244	0.139	0.146	0.142	0.148	0.149	0.123	0.105	0.124	0.143	0.171	0.153	0.191	0.217	0.253	0.138	0.481
R531	0.166	0.151	0.14	0.132	0.134	0.15	0.153	0.177	0.186	0.168	0.142	0.174	0.167	0.132	0.14	0.135	0.154	0.144	0.175	0.143	0.119	0.385	0.138	0.351
R570	0.155	0.139	0.128	0.121	0.125	0.138	0.141	0.164	0.171	0.158	0.135	0.159	0.153	0.128	0.132	0.127	0.146	0.132	0.164	0.137	0.117	0.453	0.133	0.389
R531	0.164	0.163	0.155	0.14	0.146	0.125	0.151	0.136	0.157	0.148	0.149	0.147	0.16	0.176	0.187	0.155	0.167	0.182	0.122	0.116	0.17	0.237	0.162	0.343
R570	0.15	0.151	0.143	0.129	0.136	0.114	0.14	0.126	0.145	0.144	0.139	0.133	0.15	0.166	0.178	0.146	0.154	0.169	0.112	0.109	0.168	0.238	0.154	0.376
R531	0.154	0.185	0.154	0.154	0.142	0.134	0.158	0.223	0.148	0.138	0.163	0.164	0.176	0.17	0.178	0.164	0.142	0.17	0.132	0.116	0.286	0.342	0.142	0.192
R570	0.141	0.171	0.142	0.141	0.131	0.122	0.146	0.219	0.137	0.129	0.153	0.153	0.165	0.158	0.166	0.15	0.135	0.162	0.124	0.112	0.287	0.401	0.132	0.218
R531	0.167	0.135	0.134	0.17	0.135	0.169	0.188	0.153	0.15	0.142	0.168	0.161	0.153	0.144	0.266	0.151	0.146	0.164	0.154	0.153	0.458	0.286	0.166	0.187
R570	0.153	0.124	0.122	0.157	0.125	0.156	0.183	0.147	0.138	0.135	0.16	0.148	0.141	0.133	0.264	0.138	0.135	0.151	0.145	0.158	0.561	0.327	0.156	0.214
R531	0.161	0.144	0.155	0.161	0.143	0.167	0.138	0.144	0.164	0.173	0.133	0.159	0.114	0.162	0.302	0.146	0.15	0.122	0.159	0.418	0.217	0.313	0.181	0.197
R570	0.146	0.133	0.143	0.148	0.131	0.154	0.13	0.133	0.149	0.16	0.121	0.148	0.106	0.155	0.313	0.136	0.14	0.114	0.152	0.49	0.209	0.358	0.167	0.225
R531	0.163	0.146	0.148	0.143	0.134	0.151	0.15	0.116	0.138	0.157	0.143	0.184	0.141	0.156	0.114	0.154	0.134	0.152	0.156	0.174	0.147	0.14	0.148	0.159
R570	0.15	0.135	0.137	0.13	0.122	0.138	0.139	0.109	0.127	0.148	0.133	0.171	0.129	0.142	0.105	0.146	0.124	0.139	0.146	0.177	0.144	0.136	0.139	0.165
R531	0.156	0.149	0.159	0.13	0.151	0.146	0.144	0.193	0.165	0.155	0.159	0.145	0.164	0.185	0.104	0.201	0.192	0.176	0.174	0.171	0.243	0.176	0.151	0.112
R570	0.144	0.138	0.148	0.121	0.139	0.135	0.134	0.185	0.154	0.142	0.154	0.136	0.152	0.171	0.099	0.196	0.18	0.161	0.163	0.164	0.245	0.192	0.143	0.111
R531	0.138	0.14	0.146	0.165	0.15	0.149	0.176	0.162	0.129	0.126	0.163	0.168	0.169	0.107	0.136	0.289	0.164	0.158	0.182	0.099	0.272	0.185	0.131	0.426
R570	0.126	0.131	0.136	0.154	0.139	0.137	0.169	0.154	0.121	0.122	0.152	0.154	0.158	0.104	0.128	0.283	0.154	0.152	0.171	0.095	0.274	0.202	0.123	0.494
R531	0.137	0.162	0.126	0.164	0.154	0.164	0.172	0.142	0.173	0.154	0.141	0.176	0.184	0.138	0.148	0.153	0.13	0.106	0.158	0.162	0.373	0.171	0.17	0.11
R570	0.125	0.149	0.116	0.152	0.141	0.151	0.162	0.131	0.159	0.142	0.136	0.176	0.174	0.131	0.141	0.142	0.12	0.1	0.146	0.156	0.516	0.187	0.166	0.108
R531	0.157	0.128	0.151	0.139	0.157	0.159	0.152	0.136	0.159	0.134	0.159	0.133	0.148	0.134	0.163	0.154	0.139	0.129	0.174	0.391	0.201	0.152	0.147	0.393
R570	0.145	0.117	0.138	0.128	0.144	0.147	0.143	0.126	0.145	0.126	0.149	0.122	0.138	0.129	0.151	0.149	0.128	0.127	0.162	0.405	0.2	0.155	0.136	0.442
R531	0.134	0.146	0.161	0.145	0.157	0.148	0.14	0.189	0.15	0.131	0.135	0.14	0.167	0.13	0.156	0.199	0.138	0.143	0.174	0.357	0.218	0.164	0.14	0.397
R570	0.123	0.134	0.148	0.134	0.144	0.138	0.133	0.177	0.139	0.125	0.123	0.127	0.153	0.127	0.147	0.185	0.126	0.133	0.16	0.357	0.226	0.166	0.132	0.444
R531	0.152	0.121	0.148	0.122	0.148	0.145	0.163	0.154	0.149	0.135	0.128	0.137	0.153	0.151	0.158	0.155	0.152	0.153	0.185	0.17	0.204	0.326	0.152	0.457
R570	0.14	0.111	0.137	0.113	0.136	0.133	0.153	0.144	0.14	0.126	0.122	0.126	0.142	0.147	0.151	0.146	0.141	0.142	0.17	0.162	0.214	0.422	0.14	0.531
R531	0.144	0.138	0.141	0.14	0.154	0.152	0.167	0.186	0.172	0.146	0.141	0.142	0.158	0.134	0.117	0.168	0.153	0.17	0.155	0.217	0.171	0.31	0.121	0.113
R570	0.132	0.126	0.13	0.128	0.142	0.14	0.157	0.176	0.159	0.142	0.131	0.135	0.147	0.126	0.114	0.155	0.147	0.162	0.142	0.208	0.165	0.412	0.114	0.112
R531	0.152	0.147	0.126	0.159	0.134	0.147	0.149	0.132	0.157	0.147	0.152	0.182	0.172	0.134	0.211	0.16	0.16	0.163	0.159	0.194	0.273	0.233	0.154	0.207
R570	0.141	0.135	0.116	0.146	0.123	0.136	0.144	0.121	0.145	0.144	0.149	0.168	0.16	0.131	0.218	0.145	0.149	0.15	0.146	0.229	0.278	0.232	0.145	0.207
R531	0.166	0.156	0.135	0.153	0.153	0.137	0.125	0.166	0.14	0.152	0.13	0.159	0.157	0.172	0.171	0.146	0.171	0.164	0.178	0.194	0.377	0.294	0.179	0.459
R570	0.152	0.143	0.124	0.139	0.14	0.125	0.116	0.162	0.134	0.145	0.125	0.148	0.148	0.165	0.165	0.138	0.159	0.151	0.168	0.188	0.512	0.303	0.173	0.529
R531	0.155	0.139	0.165	0.14	0.158	0.155	0.135	0.144	0.133	0.128	0.149	0.127	0.172	0.18	0.149	0.146	0.16	0.159	0.144	0.095	0.363	0.33	0.148	0.5
R570	0.144	0.127	0.151	0.129	0.145	0.143	0.127	0.137	0.123	0.117	0.142	0.118	0.161	0.17	0.141	0.143	0.151	0.148	0.135	0.092	0.5	0.387	0.137	0.566
R531	0.128	0.139	0.138	0.136	0.138	0.187	0.134	0.154	0.144	0.146	0.157	0.121	0.174	0.29	0.134	0.128	0.146	0.204	0.145	0.108	0.348	0.331	0.214	0.307
R570	0.116	0.128	0.127	0.125	0.128	0.174	0.125	0.149	0.134	0.136	0.15	0.114	0.162	0.284	0.122	0.126	0.134	0.203	0.136	0.107	0.421	0.393	0.205	0.319
R531	0.131	0.137	0.135	0.173	0.175	0.157	0.138	0.228	0.168	0.157	0.148	0.156	0.175	0.251	0.163	0.162	0.155	0.174	0.157	0.122	0.36	0.274	0.198	0.354
R570	0.119	0.127	0.123	0.16	0.16	0.145	0.129	0.233	0.159	0.147	0.136	0.144	0.164	0.249	0.153	0.148	0.144	0.173	0.145	0.118	0.437	0.294	0.191	0.381
R531	0.137	0.148	0.151	0.158	0.162	0.152	0.151	0.15	0.173	0.164	0.135	0.114	0.18	0.202	0.139	0.136	0.17	0.196	0.149	0.141	0.404	0.323	0.165	0.311
R570	0.125	0.136	0.139	0.145	0.149	0.139	0.14	0.143	0.158	0.159	0.127	0.106	0.166	0.194	0.129	0.124	0.155	0.192	0.141	0.143	0.483	0.375	0.153	0.327
R531	0.141	0.151	0.14	0.164	0.141	0.129	0.134	0.147	0.119	0.144	0.139	0.163	0.125	0.123	0.132	0.142	0.143	0.123	0.184	0.156	0.145	0.322	0.142	0.415
R570	0.13	0.139	0.129	0.152	0.129	0.117	0.125	0.138	0.108	0.138	0.129	0.151	0.114	0.118	0.133	0.131	0.134	0.125	0.176	0.161	0.148	0.374	0.137	0.477
R531	0.129	0.171	0.136	0.146	0.131	0.105	0.15	0.144	0.139	0.146	0.127	0.166	0.163	0.134	0.151	0.118	0.123	0.165	0.14	0.172	0.119	0.127	0.16	0.35
R570	0.12	0.16	0.124	0.135	0.122	0.096	0.139	0.136	0.129	0.137	0.123	0.156	0.154	0.125	0.149	0.107	0.11	0.154	0.131	0.184	0.118	0.132	0.152	0.354
R531	0.165	0.159	0.128	0.142	0.14	0.132	0.184	0.236	0.162	0.16	0.147	0.137	0.143	0.114	0.171	0.12	0.149	0.144	0.19	0.204	0.168	0.118	0.148	0.39
R570	0.153	0.147	0.117	0.131	0.129	0.121	0.172	0.243	0.151	0.155	0.142	0.127	0.13	0.106	0.152	0.112	0.141	0.136	0.182	0.215	0.169	0.123	0.141	0.409
R531	0.148	0.134	0.143	0.13	0.104	0.121	0.185	0.153	0.159	0.126	0.155	0.152	0.139	0.147	0.168	0.127	0.15	0.184	0.148	0.152	0.441	0.215	0.195	0.37
R570	0.137	0.124	0.131	0.119	0.095	0.11	0.172	0.141	0.15	0.116	0.145	0.141	0.13	0.14	0.155	0.12	0.14	0.173	0.141	0.148	0.512	0.209	0.189	0.47
R531	0.125	0.152	0.141	0.143	0.151	0.135							0.154	0.188	0.114	0.156	0.164	0.128	0.158	0.179	0.368	0.212	0.245	0.306
R570	0.114	0.141	0.13	0.132	0.139	0.124							0.145	0.183	0.104	0.144	0.152	0.121	0.146	0.172	0.412	0.232	0.241	0.318
R531	0.155	0.141	0.164	0.167	0.141	0.142							0.152	0.149	0.145	0.162	0.181	0.168		0.132	0.357	0.362	0.148	0.395
R570	0.145	0.13	0.151	0.153	0.128	0.129							0.14	0.144	0.139	0.147	0.169	0.154		0.13	0.441	0.42	0.136	0.434
R531	0.131	0.128	0.157	0.124	0.163	0.128							0.168	0.189	0.154	0.137	0.167	0.165		0.138	0.357	0.187	0.148	0.278
R570	0.119	0.118	0.144	0.113	0.151	0.116							0.155	0.181	0.147	0.129	0.16	0.153		0.137	0.43	0.184	0.141	0.291
